# Supplementary material for: The Efficient Synthesis and Anti-Fatigue Activity Evaluation of Macamides: The Unique Bioactive Compounds in Maca
Source: MDPI journal article supplement (doi:10.3390/molecules28093943), 2023-05-07
Supplement: s1 [file s1]

# SUPPLEMENTARY MATERIALS

## The efficient synthesis and anti-fatigue activity evaluation of macamides: the unique bioactive compounds in maca

Tao Liu <sup>1</sup>, Ziyang Peng <sup>1,2</sup>, Wei Lai <sup>1,2</sup>, Yan Shao <sup>1</sup>, Qing Gao <sup>1,3</sup>, Miaoxin He <sup>1,3</sup>, Wan Zhou <sup>1,3</sup>, Lirong Guo <sup>1,3</sup>, Xiaobao Jin <sup>1</sup>, Jiayao Kang <sup>4</sup> and Hui Yin <sup>1,2\*</sup>

<sup>1</sup> Guangdong Provincial Key Laboratory of Pharmaceutical Bioactive Substances, School of Basic Medical Sciences, Guangdong Pharmaceutical University, Guangzhou 510006, China; liutao@gdpu.edu.cn (T.L.); 15812315359@163.com (Z.P.); laiwei1227@foxmail.com (W.L.); 2112240280@gdpu.edu.cn (M.H.)

<sup>2</sup> Department of Microbiology and Immunology, Guangdong Pharmaceutical University, Guangzhou 510006, China

<sup>3</sup> School of pharmacy; Guangdong Pharmaceutical University, Guangzhou 510006, China

<sup>4</sup> National Key Laboratory of Biochemical Engineering, Institute of Process Engineering, Chinese Academy of Sciences, Beijing 100080, China; jykang@ipe.ac.cn

\* Correspondence: huiyin0103@gdpu.edu.cn

## Content

|                   |                                                   |   |
|-------------------|---------------------------------------------------|---|
| <b>Table S1.</b>  | $^1\text{H}$ NMR spectrums data of macamide 1-5   | 1 |
| <b>Table S2.</b>  | $^{13}\text{C}$ NMR spectrum data of macamide 1-5 | 2 |
| <b>Figure S1.</b> | Mass spectrums of macamide 2-5                    | 3 |
| <b>Figure S2.</b> | Infrared spectrums of macamide 2-5                | 4 |
| <b>Figure S3.</b> | $^{13}\text{C}$ NMR spectrums of macamide 2-5     | 5 |
| <b>Figure S4.</b> | $^1\text{H}$ NMR spectrums of macamide 2-5        | 6 |

**Table S1.** <sup>1</sup>H NMR spectrum data of macamide **1-5**. Spectrums were recorded at 400 MHz in CDCl<sub>3</sub>.

| Pro-<br>tons      | 1                 | 2                    | 3                 | 4                 | 5                 |
|-------------------|-------------------|----------------------|-------------------|-------------------|-------------------|
| 2                 | 2.20 t (4.0, 8.0) | 2.21 t (4.0, 8.0)    | 2.20 t (4.0, 8.0) | 2.20 t (4.0, 8.0) | 2.20 t (4.0, 8.0) |
| 3                 | 1.65 m            | 1.65 m               | 1.67 m            | 1.65 m            | 1.65 m            |
| 4                 | 1.25 m            | 1.31 m               | 1.31 m            | 1.31 m            | 1.30 m            |
| 5                 | 1.25 m            | 1.31 m               | 1.31 m            | 1.31 m            | 1.30 m            |
| 6                 | 1.25 m            | 1.31 m               | 1.31 m            | 1.31 m            | 1.30 m            |
| 7                 | 1.25 m            | 1.31 m               | 1.31 m            | 1.31 m            | 1.30 m            |
| 8                 | 1.25 m            | 2.06 t (8.0, 8.0)    | 2.05 d (8.0)      | 2.05 d (8.0)      | 2.07 m            |
| 9                 | 1.25 m            | 5.31 d (4.0)         | 5.39 m            | 5.41 m            | 5.37 d (4.0)      |
| 10                | 1.25 m            | 5.36 dd (20.0, 16.0) | 5.37 m            | 5.39 m            | 5.36 m            |
| 11                | 1.25 m            | 2.80 t (8.0, 4.0)    | 2.76 t (4.0, 8.0) | 2.77 t (4.0, 8.0) | 2.80 t (8.0, 4.0) |
| 12                | 1.25 m            | 5.32 m               | 5.35 m            | 5.35 m            | 5.34 m            |
| 13                | 1.25 m            | 5.33 m               | 5.34 m            | 5.32 m            | 5.32 m            |
| 14                | 1.25 m            | 2.80 t (8.0, 4.0)    | 2.04 d (8.0)      | 2.04 d (8.0)      | 2.80 t (8.0,4.0)  |
| 15                | 1.29 m            | 5.37 m               | 1.31 m            | 1.31 m            | 5.32 m            |
| 16                | 0.87 t (4.0, 8.0) | 5.33 m               | 1.31 m            | 1.31 m            | 5.31 m            |
| 17                | -                 | 1.30 m               | 1.31 m            | 1.31 m            | 2.05 m            |
| 18                | -                 | 0.97 t (8.0, 8.0)    | 0.90 t (4.0, 4.0) | 0.89 t (4.0, 8.0) | 0.97 t (4.0, 8.0) |
| 1'                | 4.44 d (8.0)      | 4.45 d (8.0)         | 4.40 d (8.0)      | 4.43 d (8.0)      | 4.40 d (8.0)      |
| 3'                | 7.21 m            | 7.28 d (4.0)         | 6.80 d (4.0)      | 7.28 m            | 6.86 m            |
| 4'                | 7.33 m            | 7.33 m               | 6.84 m            | 7.35 m            | 6.86 m            |
| 5'                | 7.28 m            | 7.32 m               | 6.81 m            | 7.29 m            | 6.82 m            |
| 6'                | 7.36 m            | 7.35 m               | -                 | 7.33 m            | -                 |
| 7'                | 7.31 m            | 7.29 d (4.0)         | 5.72 s            | 7.28 m            | 5.77 s            |
| N-H               | 5.71 br s         | 5.70 br s            | 7.28 br m         | 5.71 br s         | 7.26 br m         |
| O-CH <sub>3</sub> | -                 | -                    | 3.79 s            |                   | 3.79 s            |

**Table S2.**  $^{13}\text{C}$  NMR spectrum of macamide **1-5**. Spectrums were recorded at 100 MHz in  $\text{CDCl}_3$ .

| Carbon            | 1        | 2        | 3        | 4        | 5        |
|-------------------|----------|----------|----------|----------|----------|
| 1                 | 173.04 s | 173.38 s | 173.07 s | 172.85 s | 173.03 s |
| 2                 | 37.18 t  | 37.27 t  | 36.91 t  | 36.84 t  | 36.83 t  |
| 3                 | 25.92 t  | 29.90 t  | 26.06 t  | 25.70 t  | 29.83 t  |
| 4                 | 29.64 t  | 29.74 t  | 29.74 t  | 27.34 t  | 29.15 t  |
| 5                 | 30.00 t  | 29.70 t  | 29.40 t  | 29.84 t  | 29.71 t  |
| 6                 | 30.00 t  | 29.58 t  | 27.18 t  | 29.84 t  | 29.61 t  |
| 7                 | 30.00 t  | 27.66 t  | 26.06 t  | 29.84 t  | 27.40 t  |
| 8                 | 30.00 t  | 25.52 t  | 26.02 t  | 29.84 t  | 25.25 t  |
| 9                 | 30.00 t  | 132.34 d | 128.18 d | 130.45 d | 131.99 d |
| 10                | 30.00 t  | 128.19 d | 113.59 d | 127.45 d | 130.27 d |
| 11                | 30.00 t  | 26.21 t  | 22.61 t  | 22.74 t  | 25.25 t  |
| 12                | 30.00 t  | 128.14 d | 113.08 d | 127.45 t | 129.12 d |
| 13                | 30.00 t  | 127.98 d | 128.00 d | 130.15 d | 128.44 d |
| 14                | 32.07 t  | 26.08 t  | 27.18 t  | 29.84 t  | 25.25 t  |
| 15                | 22.71 t  | 127.72 d | 26.06 t  | 29.84 t  | 127.63 d |
| 16                | 14.26 q  | 130.98 d | 31.62 d  | 31.80 d  | 126.96 d |
| 17                | -        | 20.89 t  | 26.02 t  | 25.88 t  | 20.28 t  |
| 18                | -        | 14.54 q  | 14.31 q  | 14.18 q  | 14.79 q  |
| 1'                | 43.96 t  | 43.90 t  | 43.54 t  | 43.75t   | 43.81 t  |
| 2'                | 138.56 s | 138.90 s | 140.09 s | 138.48 s | 140.49 s |
| 3'                | 128.24 d | 129.06 d | 130.56 d | 128.90 d | 120.17 d |
| 4'                | 128.86 d | 128.69 d | 130.18 d | 127.15 d | 126.96 d |
| 5'                | 127.74 d | 128.69 d | 120.31 d | 127.15 d | 113.41 d |
| 6'                | 128.86 d | 128.69 d | 160.08 d | 127.95 d | 160.18 d |
| 7'                | 128.24 d | 129.06 d | 129.75 d | 128.90 d | 113.01 d |
| O-CH <sub>3</sub> | -        | -        | 55.45 d  |          | 55.13 d  |

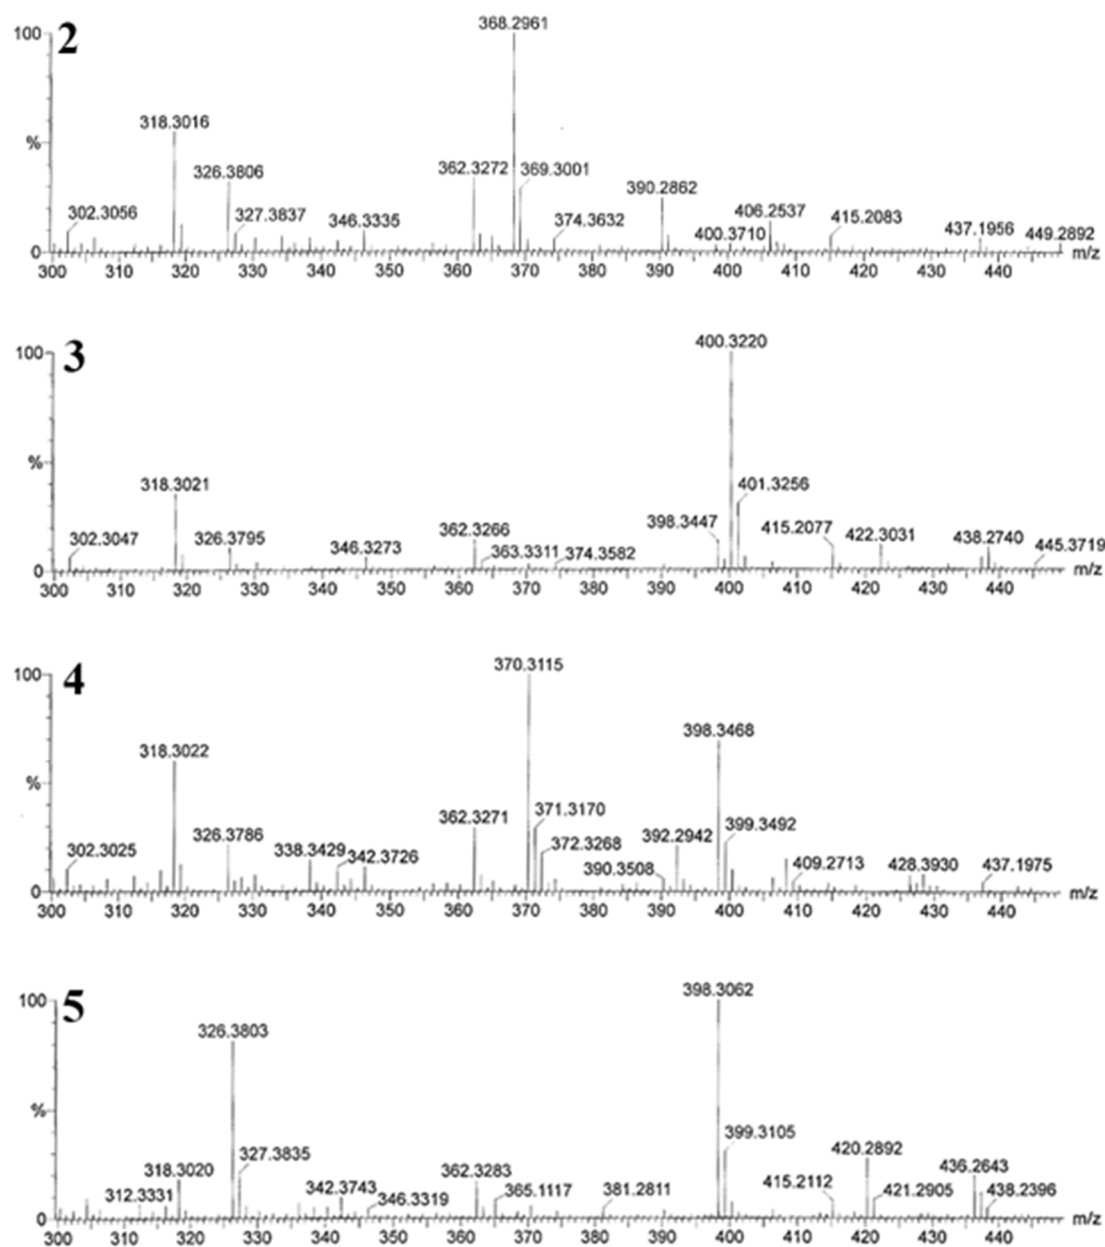

Figure S1. Mass spectra of macamide 2-5.

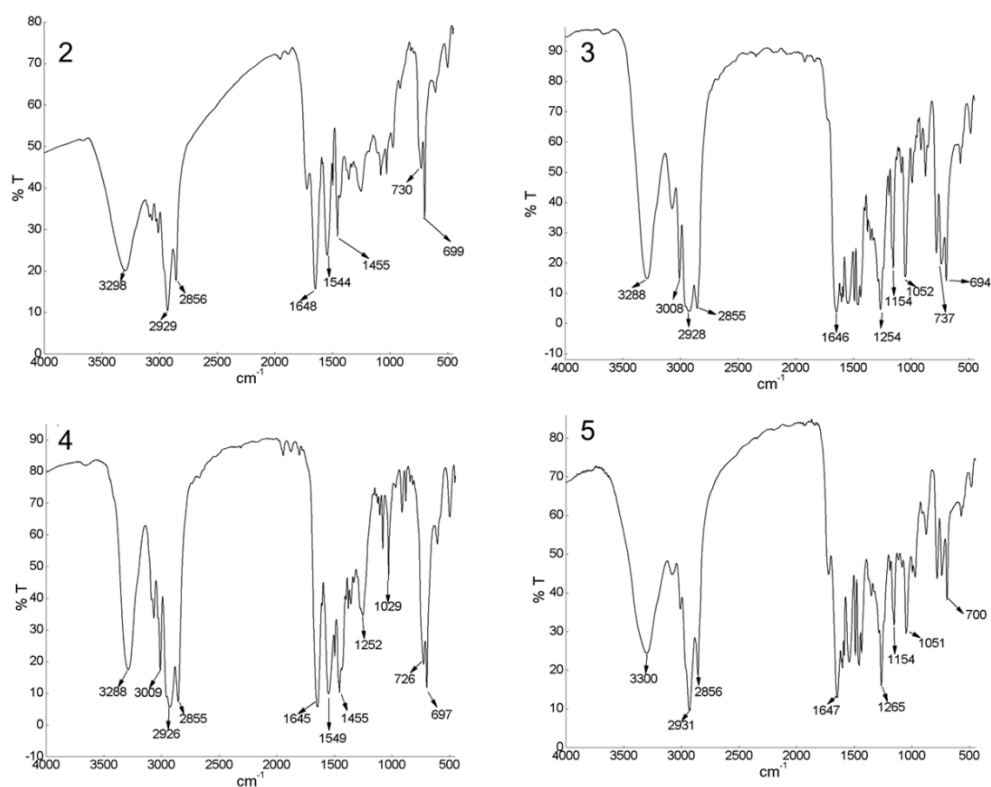

**Figure S2.** Infrared spectra of macamide 2-5.

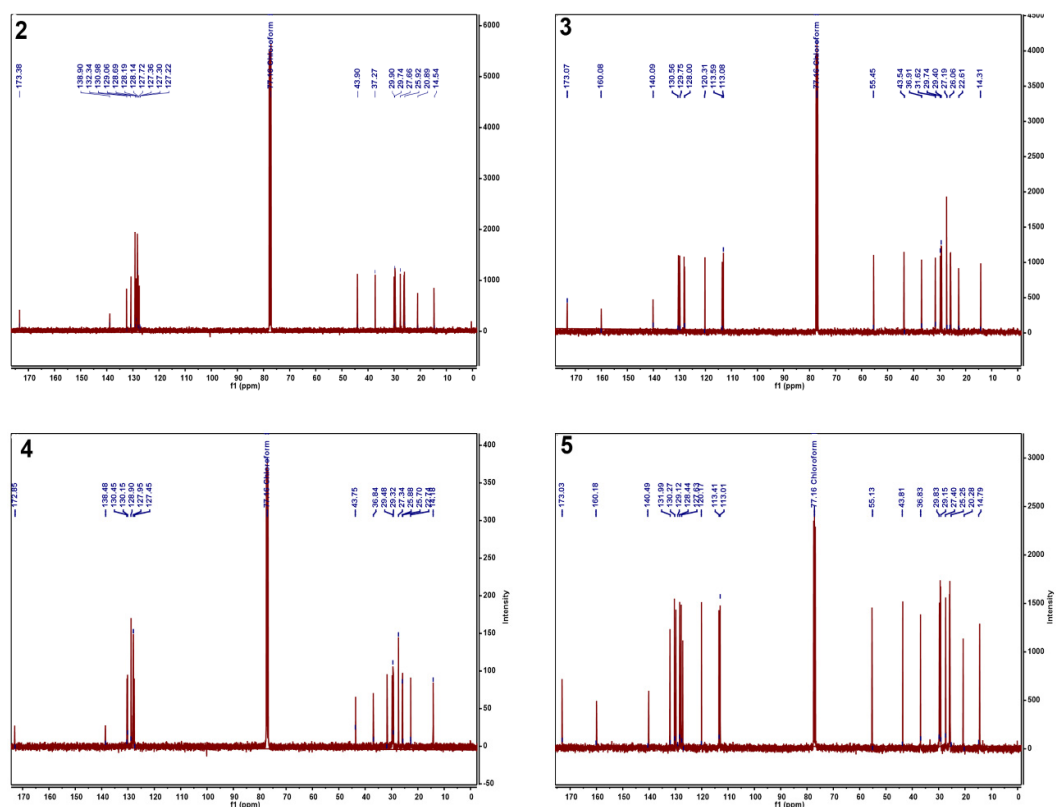

**Figure S3.** <sup>13</sup>C NMR spectra of macamide 2-5.

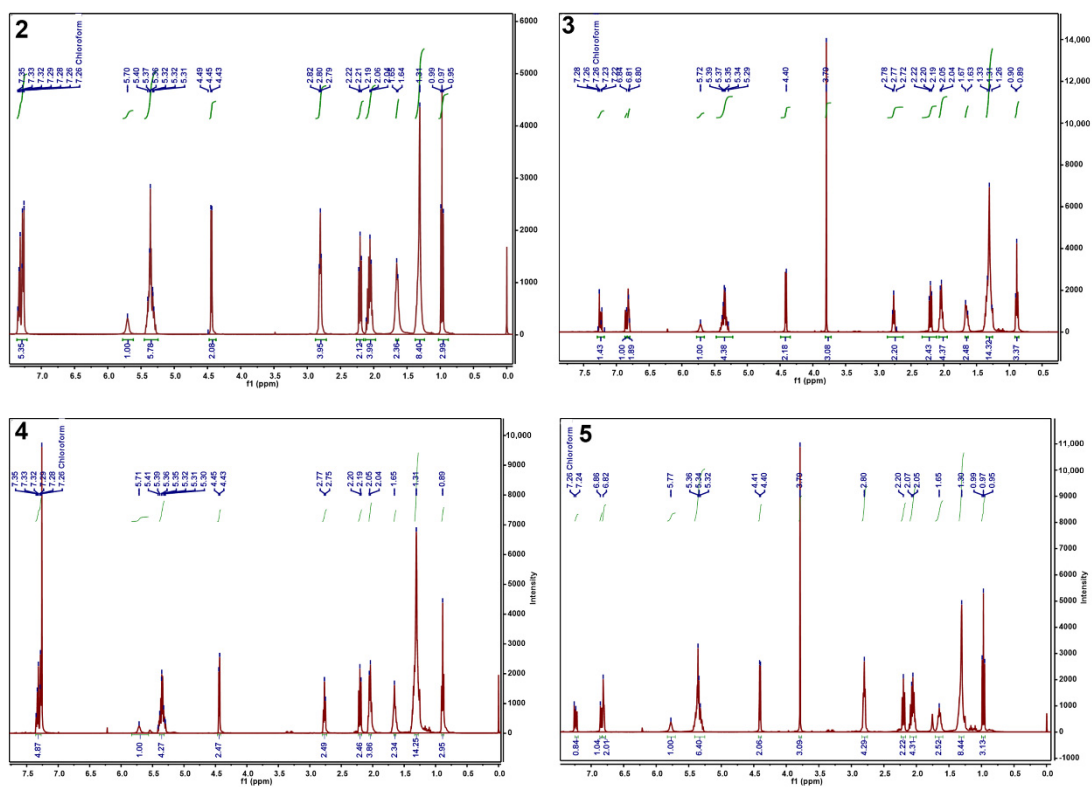

Figure S4.  $^1\text{H}$  NMR spectrum of macamide 2-5.
